# Supplementary material
Source: ML conference proceedings conference paper supplement (https://openaccess.thecvf.com/content/CVPR2023/html/Moltisanti_Learning_Action_Changes_CVPR_2023_paper.html)
Supplement: Supplementary file 1 [file Moltisanti_Learning_Action_Changes_CVPR_2023_supplemental.zip]

Archive with 2 entries (2 files):
- Learning Action Changes by Measuring Verb-Adverb Textual Relationships - supplementary.pdf
- AIR_samples.mp4
